# Supplementary material for: A colorimetric/SERS dual-mode sensing method for the detection of mercury(ii) based on rhodanine-stabilized gold nanobipyramids
Source: Royal Society of Chemistry journal article supplement (doi:10.1039/c8tc03980a), 2018-01-01
Supplement: c8tc03980a1.pdf [file c8tc03980a1.pdf]

## **A colorimetric/SERS dual-mode sensing for detection of mercury (II) based on rhodanine stabilized gold nanobipyramids**

Ying Qi<sup>†</sup>, Jing Zhao<sup>†</sup>, Guo-jun Weng, Jian-jun Li, Xin Li, Jian Zhu\*, Jun-wu Zhao\*

The Key Laboratory of Biomedical Information Engineering of Ministry of Education,  
School of Life Science and Technology, Xi'an Jiaotong University,

Xi'an 710049, China

\* Corresponding author

**Telephone:** 86-29-82664224

**Fax numbers:** 86-29-82664224

**Email:** nanoptzhao@163.com (Jun-Wu Zhao)

nanoptzj@163.com (Jian Zhu)

**Address:** School of Life Science and Technology,

Xi'an Jiaotong University,

Xi'an, 710049,

Peoples Republic of China

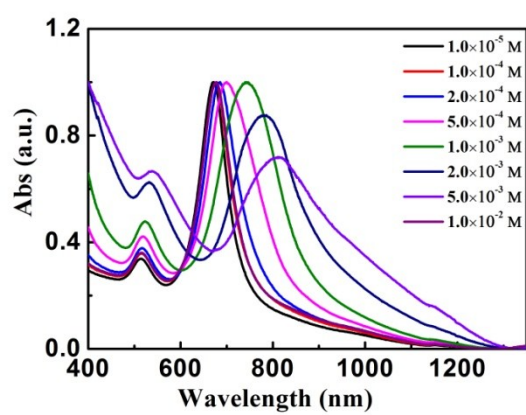

Figure S1. The effect of the concentration of rhodanine on the normalized absorption spectra of rhodanine stabilized Au NBs after addition of  $\text{Hg}^{2+}$ . pH=7.0;  $C_{\text{Hg}^{2+}}$ ,  $5.0 \times 10^{-5}$  M.

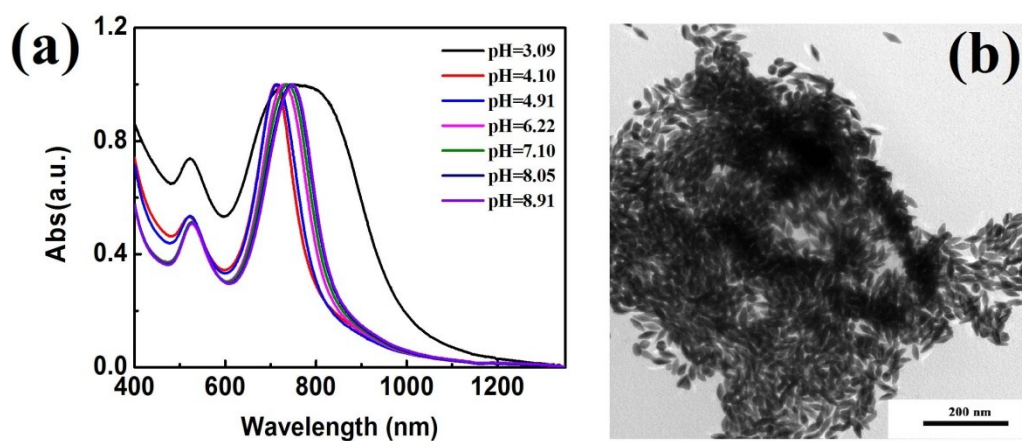

Figure S2. (a) The effect of the pH on the normalized absorption spectra of rhodamine stabilized Au NBs after addition of  $\text{Hg}^{2+}$ ; (b) TEM images of the rhodamine-stabilized Au NBs under the high acidic condition (pH=3.09).  $C_{\text{rhodanine}}, 2.0 \times 10^{-3} \text{ M}$ ;  $C_{\text{Hg}^{2+}}, 5.0 \times 10^{-5} \text{ M}$ .

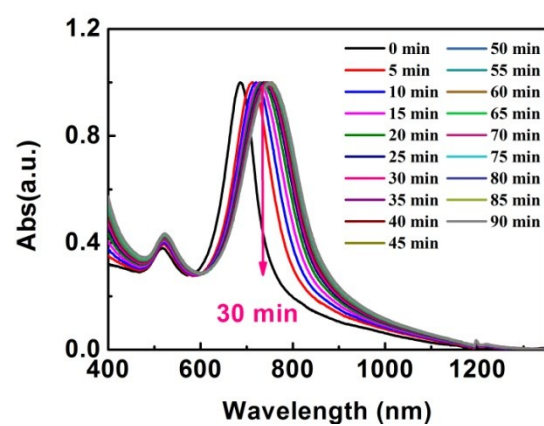

Figure S3. The effect of the reaction time on the normalized absorption spectra of rhodanine stabilized Au NBs after addition of  $\text{Hg}^{2+}$ .  $\text{pH}=7.0$ ;  $C_{\text{rhodanine}}, 2.0 \times 10^{-3} \text{ M}$ ;  $C_{\text{Hg}^{2+}}, 5.0 \times 10^{-5} \text{ M}$ .
